# Supplementary material for: Quantification and Comprehensive Analysis of Mesenchymal Stromal Cells in Bone Marrow Samples from Sickle Cell Disease Patients with Osteonecrosis
Source: Hindawi journal article supplement (doi:10.1155/2020/8841191), 2020-11-24
Supplement: f1 [file 8841191.f1.pdf]

**Supplementary Table S1. Clinical and biochemical characteristics of patients**

| <b>Parameter</b>                             | <b>SCD</b>     | <b>NS</b>      | <b>P value</b> |
|----------------------------------------------|----------------|----------------|----------------|
| <b>N° of individuals</b>                     | 32             | 19             |                |
| <b>Average Age of the donors</b>             | 28.4 (10 – 55) | 46.9 (24 – 74) |                |
| <b>Male</b>                                  | 13 (40.62 %)   | 11 (57.90 %)   |                |
| <b>Female</b>                                | 19 (59.38 %)   | 8 (42,10 %)    |                |
| <b>Localization</b>                          |                |                |                |
| <b>Femoral Head</b>                          | 16             | 9              |                |
| <b>Knee</b>                                  | 6              | 0              |                |
| <b>Hip</b>                                   | 16             | 4              |                |
| <b>Hematological Data</b>                    |                |                |                |
| <b>Hb (g/L)</b>                              | 10.08 ± 1.78   | 11.90 ± 3.81   | 0.0054         |
| <b>Hematocrit (%)</b>                        | 17.90 ± 11.99  | 37.11 ± 8.09   | < 0.0001       |
| <b>Platelet count (x 10<sup>3</sup>/ μL)</b> | 342.4 ± 154.9  | 168.6 ± 79.82  | < 0.0001       |

Demographic and baseline biochemical characteristics of subjects are presented in Supplementary Table. All variables presented as mean (range), n (%) or mean (standard deviation). Abbreviations: Hb, Hemoglobin.

**Supplementary Table 2. Data with MSC count/mL respective to Fig 3b**

| <b>Patient</b> | <b>Age</b> | <b>Gender</b> | <b>Group</b> | <b>CD271<sup>+</sup>CD45<sup>-low</sup></b> | <b>CFU-F</b> |
|----------------|------------|---------------|--------------|---------------------------------------------|--------------|
| <b>1</b>       | 10         | F             | SCD          | 2480                                        | 50           |
| <b>2</b>       | 15         | F             | SCD          | 7800                                        | 30           |
| <b>3</b>       | 12         | M             | SCD          | 7880                                        | 595          |
| <b>4</b>       | 12         | F             | SCD          | 21870                                       | 110          |
| <b>5</b>       | 12         | F             | SCD          | 3480                                        | 110          |
| <b>6</b>       | 18         | F             | SCD          | 8140                                        | 30           |
| <b>7</b>       | 24         | F             | NS           | 16800                                       | 760          |
| <b>8</b>       | 25         | M             | SCD          | 14410                                       | 360          |
| <b>9</b>       | 26         | M             | SCD          | 2550                                        | 20           |
| <b>10</b>      | 29         | M             | NS           | 11280                                       | 10           |
| <b>11</b>      | 30         | F             | SCD          | 5820                                        | 20           |
| <b>12</b>      | 43         | M             | NS           | 6660                                        | 50           |
| <b>13</b>      | 44         | F             | SCD          | 3456                                        | 120          |
| <b>14</b>      | 45         | M             | NS           | 1710                                        | 40           |
| <b>15</b>      | 49         | F             | NS           | 2320                                        | 120          |
| <b>16</b>      | 53         | F             | NS           | 7840                                        | 12           |
| <b>17</b>      | 55         | F             | SCD          | 6580                                        | 40           |
| <b>18</b>      | 57         | F             | NS           | 2960                                        | 15           |
| <b>19</b>      | 59         | M             | NS           | 1106                                        | 10           |
| <b>20</b>      | 74         | F             | NS           | 3050                                        | 12           |

Abbreviations: F, female; M, male, CFU-F, Colony-forming unit fibroblast; MSC, mesenchymal stromal cells

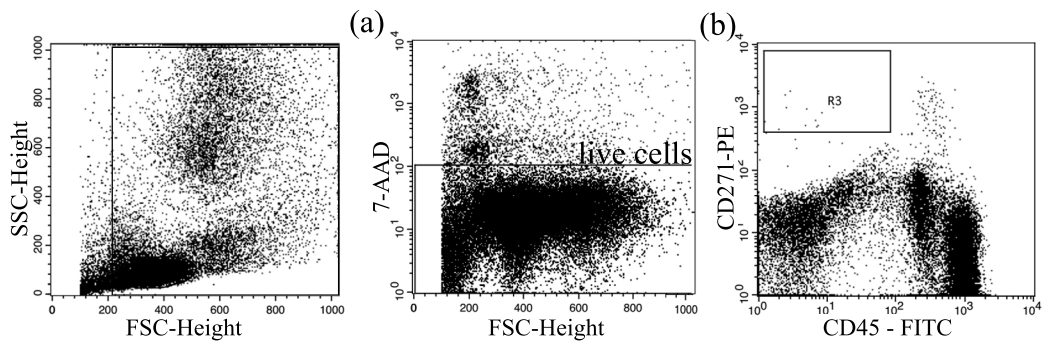

**Supplementary Figure S1:** Gating strategy for the frequency of CD271<sup>+</sup>CD45<sup>-low</sup> cell phenotype. Cell debris are removed from the analysis based on forward scatter. (a) Dead cells are gated out based on the uptake of 7-AAD. (b) Frequency assessment of CD271<sup>+</sup>CD45<sup>-low</sup> cells are based on a simple rectangular gate.
